# Supplementary material for: Both the concentration and redox state of glutathione and ascorbate influence the sensitivity of arabidopsis to cadmium
Source: PubMed Central journal article supplement (PMC4577996; doi:10.1093/aob/mcv075), 2015-06-12
Supplement: supp_mcv075_aob-15046-s01.pdf [file supp_mcv075_aob-15046-s01.pdf]

## SUPPLEMENTARY DATA

**Table S1.** List of primers used in the reverse transcription quantitative PCR. Exon-Exon-junction (E-E-jn), Intron-Exon-junction (In-E-jn).

| Gene                 | Locus     | Annotation                      | Primer sequences                                              | Exon location | Amplicon size | Primer efficiency |
|----------------------|-----------|---------------------------------|---------------------------------------------------------------|---------------|---------------|-------------------|
| <i>APX1</i>          | AT1G07890 | Ascorbate peroxidase1           | FW: TGCCACAAGGATAGGTCTGG<br>REV: CCTTCCTTCTCTCCGCTCAA         | Exon 5        | 101 bp        | 96.3 %            |
| <i>APX2</i>          | AT3G09640 | Ascorbate peroxidase2           | FW: TTGCTGTTGAGATCACTGGAGGA<br>REV: TGAGGCAGACGACCTTCAGG      | Exon 3        | 91 bp         | 90.9 %            |
| <i>AT1G19020</i>     | AT1G19020 | Unknown oxidative stress marker | FW: GAAAATGGGACAAGGGTTAGACAAA<br>REV: CCAACGAAAACCAATAGCAGA   | Exon 1        | 92 bp         | 95.7 %            |
| <i>AT1G05340</i>     | AT1G05340 | Unknown oxidative stress marker | FW: TCGGTAGCTCAGGGTAAAGTGG<br>REV: CCAGGGCACAACAGCAACA        | Exon 2        | 91 bp         | 99.1 %            |
| <i>CAT1</i>          | AT1G20630 | Catalase1                       | FW: AAGTGCTTCATCGGGAAGGA<br>REV: CTTCAACAAAACGCTTCACGA        | E5-E6-jn      | 103 bp        | 97.6 %            |
| <i>CAT2</i>          | AT4G35090 | Catalase2                       | FW: AACTCCTCCATGACCGTTGGA<br>REV: TCCGTTCCCTGTGCGAAATTG       | Exon 2        | 76 bp         | 98.3 %            |
| <i>CAT3</i>          | AT1G20620 | Catalase3                       | FW: TCTCCAACAACATCTCTCCCTCA<br>REV: GTGAAATTAGCAACCTTCTCGATCA | Exon 2        | 91 bp         | 95.6 %            |
| <i>CSD1</i>          | AT1G08830 | CuZn superoxide dismutase1      | FW: TCCATGCAGACCCTGATGAC<br>REV: CCTGGAGACCAATGATGCC          | Exon 5        | 102 bp        | 93.8 %            |
| <i>CSD2</i>          | AT2G28190 | CuZn superoxide dismutase2      | FW: GAGCCTTTGTGGTTCACGAG<br>REV: CACACCACATGCCAATCTCC         | Exon 6        | 101 bp        | 93.9 %            |
| <i>defensin-like</i> | AT2G43510 | Defensin-like                   | FW: ATGGCAAAGGCTATCGTTTCC<br>REV: CGTTACCTTGCGCTTCTATCTCC     | Exon 1        | 91 bp         | 96.8 %            |
| <i>DHAR1</i>         | AT5G16710 | Dehydroascorbate reductase1     | FW: CCAGATTCACTTCCTTTCGTCAA<br>REV: TTACATCCTCTGTTTCCGCCC     | Exon 6        | 91 bp         | 94.0 %            |
| <i>DHAR2</i>         | AT1G75270 | Dehydroascorbate reductase2     | FW: ATCAGATGGGTCTTGTAAGGAAGC<br>REV: GTGCTCCTGATGTTCTCGGC     | Exon 2        | 91 bp         | 95.1 %            |
| <i>DHAR3</i>         | AT1G19550 | Dehydroascorbate reductase3     | FW: AACTCTTTCCCCGGCGATAA<br>REV: CTGAATTTGCCTCTGTTGGCTC       | Exon 1        | 92 bp         | 95.2 %            |
| <i>FSD1</i>          | AT4G25100 | Fe superoxide dismutase1        | FW: CTCCAATGCTGTGAATCCC<br>REV: TGGTCTTCGGTTCTGGAAGTC         | Exon 4        | 101 bp        | 88.8 %            |
| <i>GRI</i>           | AT3G24170 | Glutathione reductase1          | FW: CTCAAGTGTGGAGCAACCAAAG<br>REV: ATGCGTCTGGTCACACTGC        | Exon 15       | 101 bp        | 94.79%            |
| <i>GR2</i>           | AT3G54660 | Glutathione reductase2          | FW: GCCCAGATGGATGGAACAGAT<br>REV: TAGGGTTGGAGAATGTTGGCG       | Exon 5        | 91 bp         | 96.4 %            |

| Gene               | Locus     | Annotation                            | Primer sequences                                                      | Exon location | Amplicon size | Primer efficiency |
|--------------------|-----------|---------------------------------------|-----------------------------------------------------------------------|---------------|---------------|-------------------|
| <i>GSH1</i>        | AT4G23100 | $\gamma$ -Glutamylcysteine synthetase | FW: CCCTGGTGAAGTGCCTTCA<br>REV: CATCAGCACCTCTCATCTCCA                 | Exon 5        | 101 bp        | 98.6 %            |
| <i>GSH2</i>        | AT5G27380 | Glutathione synthetase                | FW: GGACTCGTCGTTGGTGACAA<br>REV: TCTGGGAATGCAGTTGGTAGC                | Exon 11       | 101 bp        | 92.6 %            |
| <i>pri-MIR398a</i> | AT2G03445 | Primary microRNA398a                  | FW: AGAAGAAGAGAAGAACAACAGGAGGTG<br>REV: ATTAGTAAGGTGAAAAAATGG         | In1-E1-jn     | 156 bp        | 96.5 %            |
| <i>pri-MIR398b</i> | AT5G14545 | Primary microRNA398b                  | FW: AGTAATCAACGGCTGTAATGACGCTAC<br>REV: TGACCTGAGAACACATGAAAACGAGAG   | Exon 1        | 67 bp         | 85.3 %            |
| <i>pri-MIR398c</i> | AT5G14545 | Primary microRNA398c                  | FW: TCGAAACTCAAACGTAAACAGTCC<br>REV: ATTTGGTAAATGAATAGAAGCCACGGGCCACG | Exon 1        | 241 bp        | 104.2 %           |
| <i>PCSI</i>        | AT5G44070 | Phytochelatin synthase1               | FW: TGCCAAGGAGCTGAAATCTT<br>REV: ACCGTGCCTTCAGAGTCATC                 | Exon 2        | 91 bp         | 95.1 %            |
| <i>PPR</i>         | AT5G55840 | Pentatricopeptide repeat protein      | FW: AAGACAGTGAAGGTGCAACCTTACT<br>REV: AGTTTTTGAGTTGTATTTGTCAGAGAAAAG  | Intron 2      | 59 bp         | 81.5 %            |
| <i>SAND</i>        | AT2G28390 | SAND family                           | FW: AACTCTATGCAGCATTGATCCACT<br>REV: TGATTGCATATCTTTATCGCCATC         | Exon 13       | 61 bp         | 107.8 %           |
| <i>Tip41</i>       | AT4G34270 | Tip41-like protein                    | FW: GTGAAAACCTGTTGGAGAGAAGCAA<br>REV: TCAACTGGATACCCTTTCGCA           | E1-E2-jn      | 61 bp         | 91.2 %            |
| <i>TIR-class</i>   | AT1G57630 | Toll-interleukin-1 class              | FW: ACTCAAACAGGCGATCAAAGGA<br>REV: CACCAATTCGTCAAGACAACACC            | Exon 1        | 91 bp         | 97.3 %            |
| <i>UBC</i>         | AT5G25760 | Ubiquitin conjugating enzyme          | FW: CTGCGACTCAGGAATCTTCTAA<br>REV: TTGTGCCATTGAATTGAACCC              | E3-E4-jn      | 61 bp         | 98.7 %            |
| <i>UPOX</i>        | AT2G21640 | Up-regulated by oxidative stress      | FW: GACTTGTTTCAAAAACACCATGGAC<br>REV: CACTTCCTTAGCCTCAATTGCTTC        | Exon 1        | 91 bp         | 95.9 %            |

**Table S2.** Reverse transcription quantitative PCR parameters according to the Minimum Information for publication of Quantitative real-time PCR Experiments (MIQE) précis checklist derived from Bustin *et al.*, 2009.

| <b>Sample/Template</b>               |                                                                                                                                  |
|--------------------------------------|----------------------------------------------------------------------------------------------------------------------------------|
| Source                               | <i>Arabidopsis thaliana</i> roots or shoots in a hydroponic culture                                                              |
| Method of preservation               | harvest in liquid N <sub>2</sub> then stored at -80°C                                                                            |
| Storage time                         | three weeks                                                                                                                      |
| Handling                             | frozen                                                                                                                           |
| Extraction method                    | columns: RNAqueous Total RNA Isolation Kit* (Ambion, Lennik, Belgium)                                                            |
| RNA: DNA-free                        | TURBO DNA-free Kit* (Ambion, Lennik, Belgium)<br>intron-spanning primers and verification of single peak on melt curves          |
| Concentration                        | NanoDrop <sup>®</sup> : ND-1000 Spectrofotometer (Isogen Life Science, IJsselstein, the Netherlands)                             |
| RNA: integrity                       | Microfluidics: Bioanalyzer* (Agilent Technologies, Waldbronn, Duitsland)<br>for a representative subset of the samples           |
| <b>Assay optimisation/validation</b> |                                                                                                                                  |
| Accession number                     | see Table S.1                                                                                                                    |
| Amplicon details                     | exon location & amplicon size: see Table S.1                                                                                     |
| Primer sequence                      | see Table S.1                                                                                                                    |
| <i>In silico</i>                     | Primer-BLAST                                                                                                                     |
| Empirical                            | primer concentration (300 nM), annealing temperature (60°C)                                                                      |
| Priming conditions                   | random hexamer priming                                                                                                           |
| PCR efficiency                       | dilution curves (slope, deviation, see Table S.1)                                                                                |
| Linear dynamic range                 | samples are within the efficiency curve                                                                                          |
| <b>RT/PCR</b>                        |                                                                                                                                  |
| Protocols                            | TURBO DNA-free Kit* (Ambion, Lennik, Belgium)<br>Fast SYBR Green* (Applied Biosystems, Paisley, UK)<br>see Materials and Methods |
| Reagents                             | see Materials and Methods                                                                                                        |
| NTC                                  | C <sub>q</sub> & melt curves                                                                                                     |
| <b>Data analysis</b>                 |                                                                                                                                  |
| Specialist software                  | 7500 Fast System Sequence Detection Software, version 1.4<br>(Applied Biosystems, Lennik, Belgium, 2001-2006)                    |
| Statistical justification            | 4 biological replicates, two-way ANOVA<br>and Tukey post-hoc adjustment for multiple comparison                                  |
| Normalisation                        | 3 reference genes selected using geNorm, version 3.5<br>(Center for Medical Genetics, Ghent, Belgium, 2001-2007)                 |

\*All procedures were performed according to the manufacturer's protocol.
